# Supplementary figures and images for: Runx1 and Runx2 cooperate during sternal morphogenesis
Source: Oxford University Press journal article supplement (doi:10.1242/dev.045005), 2010-02-25

**A**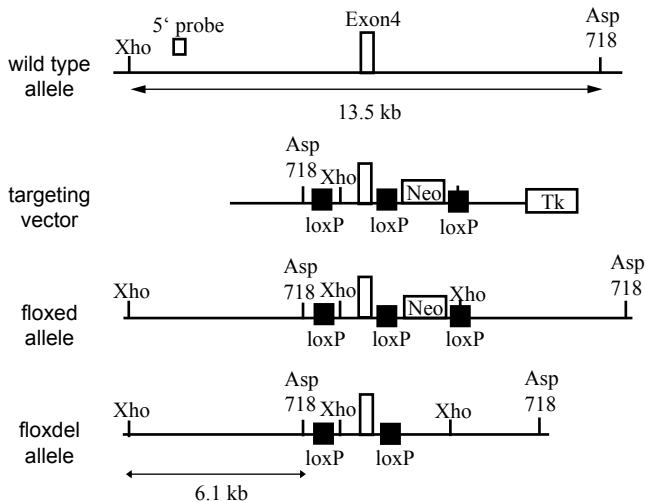**B**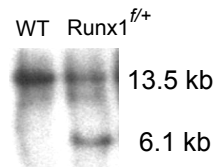**C**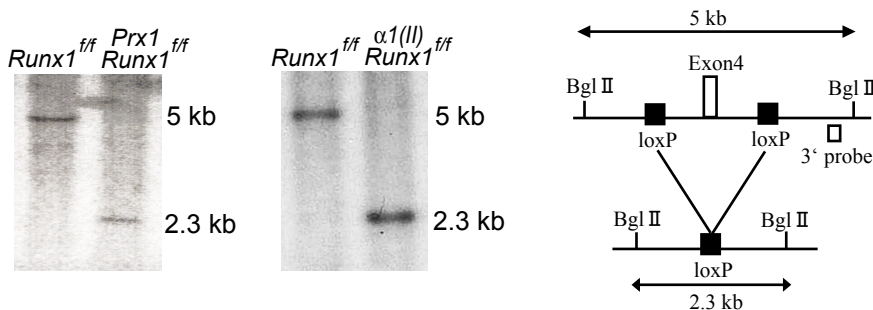**D**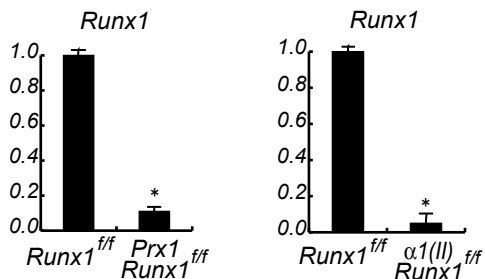

Supplement: dev045005-sup-045005figs1.pdf [file dev045005-sup-045005figs1.pdf]

**A**

wt

*Prx1 Runx1<sup>fl/fl</sup>*

2w

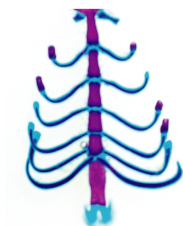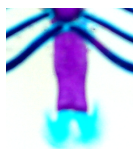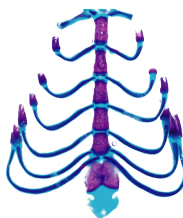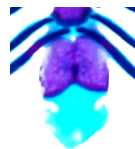

3w

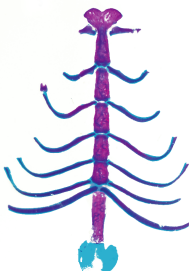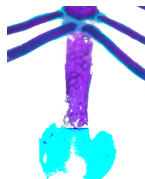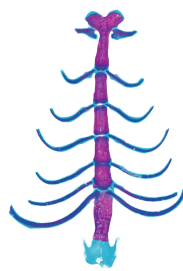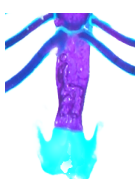**B***Runx2 +/-*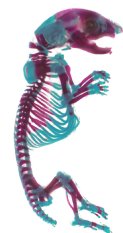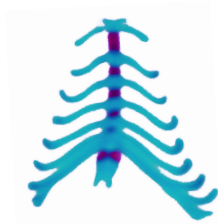

Supplement: dev045005-sup-045005figs2.pdf [file dev045005-sup-045005figs2.pdf]

**A**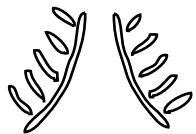

E12.5

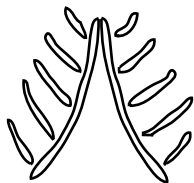

E13.5

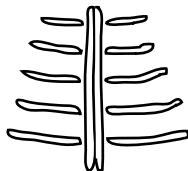

E14.5

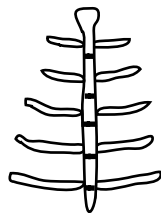

E16.5

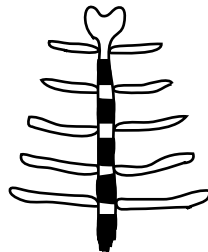

P0

**B**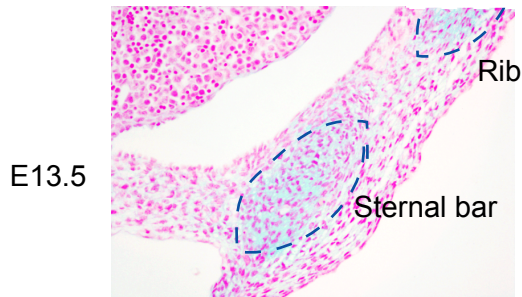

E13.5

Rib

Sternal bar

Supplement: dev045005-sup-045005figs3.pdf [file dev045005-sup-045005figs3.pdf]

*Prx1* DKO  
E14.5

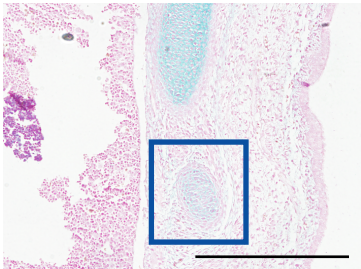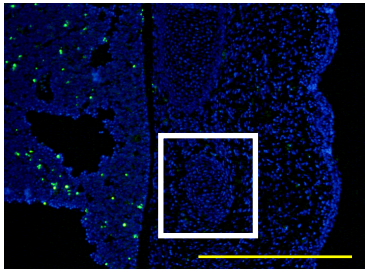

Supplement: dev045005-sup-045005figs4.pdf [file dev045005-sup-045005figs4.pdf]

## *Runx1*

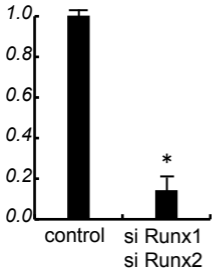

## *Runx2*

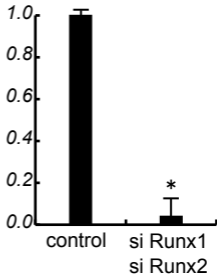

Supplement: dev045005-sup-045005figs5.pdf [file dev045005-sup-045005figs5.pdf]
